# Supplementary material for: In vitro evidence for post-insult neuroprotective activity of an evolutionarily conserved motif against excitotoxic neuronal cell death
Source: PubMed Central journal article supplement — Neuroreport. 2019 Jan 18;30(3):213–6. doi: 10.1097/WNR.0000000000001186 (PMC6380445; doi:10.1097/wnr.0000000000001186), 2019-01-18
Supplement: wnr-30-213-s001.pdf [file wnr-30-213-s001.pdf]

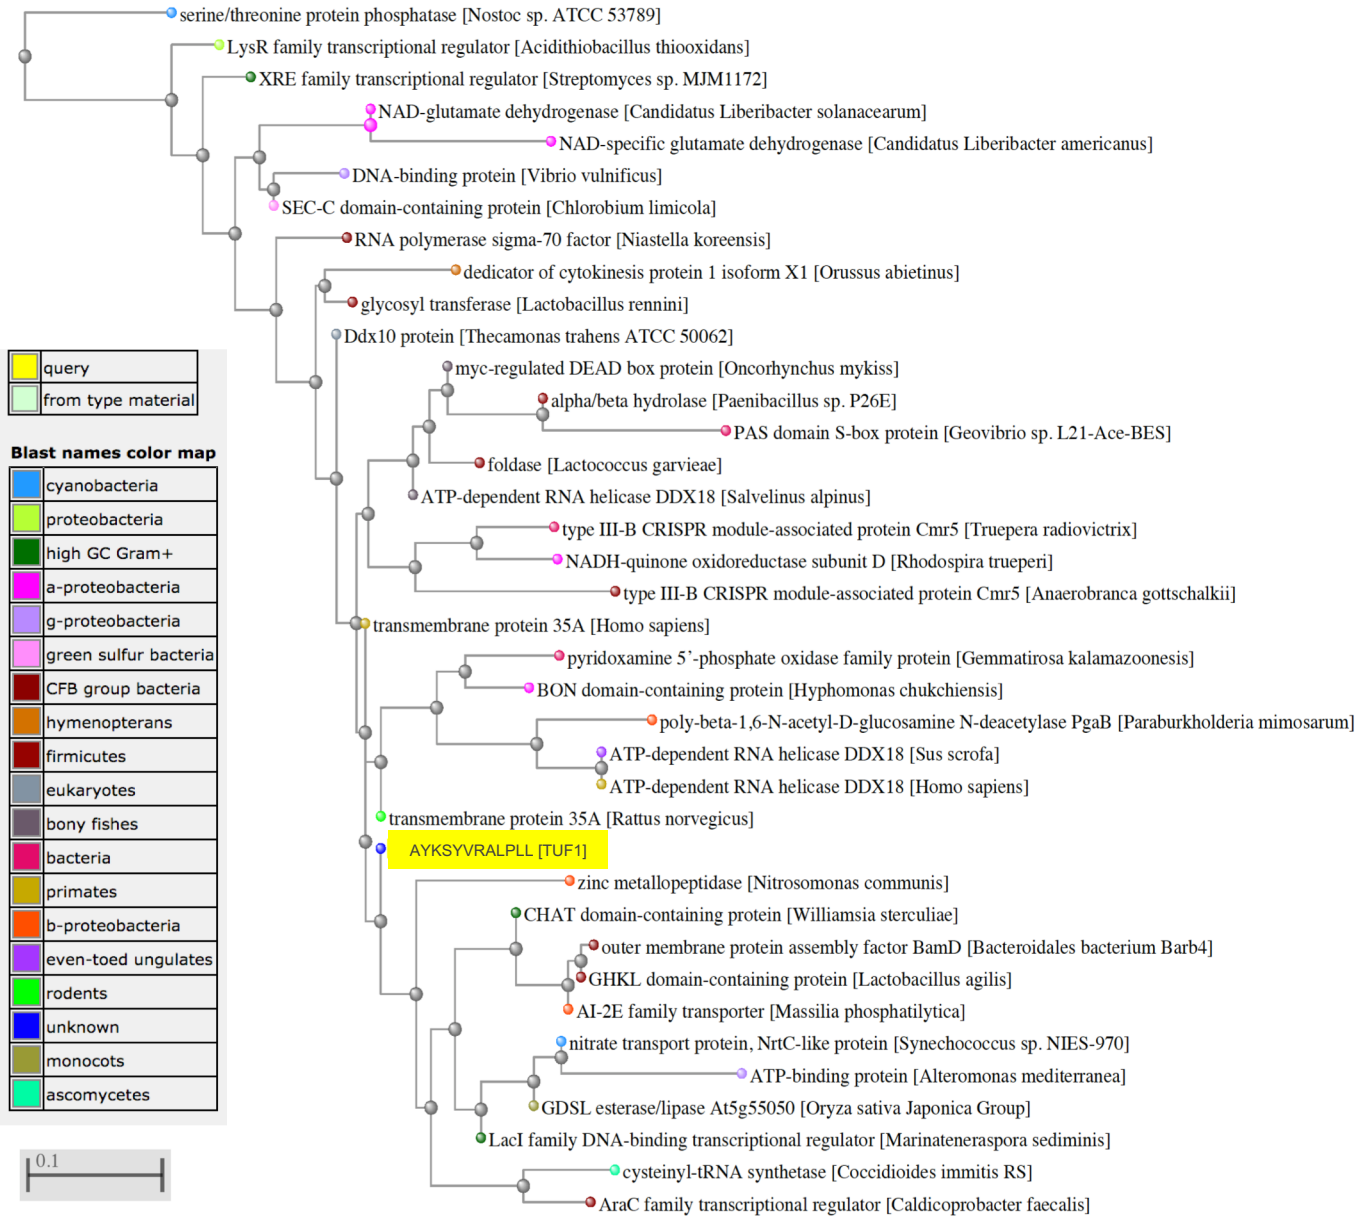

Tran PV, Supplemental Figure 1: Evolutionary conservation of TUF1 peptide (highlighted) with >75% identity among proteins of various species from cyanobacteria to mammals. Sequence analysis was performed using NCBI Blast tool.
